# Supplementary material for: Risk Stratified Follow-Up for Endometrial Cancer: The Clinicians’ Perspective
Source: MDPI journal article supplement (doi:10.3390/curroncol30020173), 2023-02-13
Supplement: s1 [file s1]

## Article

# Risk Stratified Follow-Up for Endometrial Cancer: The Clinicians' Perspective

Anumithra Amirthanayagam <sup>1</sup>, Louise Boulter <sup>2</sup>, Nessa Millet <sup>1</sup>, Hilary J. McDermott <sup>3</sup>, Jo Morrison <sup>4</sup>, Alexandra Taylor <sup>5</sup>, Tracie Miles <sup>6</sup>, Lorna Coton <sup>6</sup> and Esther L. Moss <sup>1,2,\*</sup>

**Table S1.** Online Questionnaire to Gynaecological oncology Clinical Nurse Specialists (n=22).

| Question                                                                                                                       | Results                                                                                                                                                                                                                                                                                                                                                         |
|--------------------------------------------------------------------------------------------------------------------------------|-----------------------------------------------------------------------------------------------------------------------------------------------------------------------------------------------------------------------------------------------------------------------------------------------------------------------------------------------------------------|
| Are you a Clinical Nurse Specialist in gynaecology?                                                                            | Yes 96% (22/23)<br>No (4%) (1/23)                                                                                                                                                                                                                                                                                                                               |
| How long have you been in your current post?                                                                                   | Median = 5 months<br>Minimum = 12 months<br>Maximum = 370 months                                                                                                                                                                                                                                                                                                |
| How many Clinical Nurse Specialists (including yourself) work in your team?                                                    | Median = 2 CNS<br>Minimum = 1 CNS<br>Maximum = 4 CNS                                                                                                                                                                                                                                                                                                            |
| Where do you work?                                                                                                             | Cancer centre 10 (45.5%)<br>Cancer unit 8 (36.4%)<br>Cancer Centre and unit 3 (13.6%)                                                                                                                                                                                                                                                                           |
| Does your centre/unit follow any guidelines for the follow-up of endometrial cancer?                                           | BGCS 15/22 (68.2%)<br>Regional Cancer Network 14/22 (63.6%)<br>ESGO 5/22 (22.7%)<br>Local Cancer Centre/Unit 8/22 (36.4%)<br>BGCS only 5/22(22.7%)<br>Remainder used a combination of above options 17/22 (77.3%)                                                                                                                                               |
| If you have local guidelines for your cancer centre/unit, how often are these updated?                                         | Annually 5/22 (22.7%)<br>Unsure/not known 3/22 (13.6%)<br>Less frequently than 1 year 4/22 (18.2%)<br>Unanswered 10/22 (45.4%)                                                                                                                                                                                                                                  |
| Who is responsible for updating the local guidelines that your centre/unit uses                                                | Both lead clinician and CNS 9/22 (40.9%)<br>Both lead clinician, CNS and different members of the team 2/22 (9.1%)<br>Clinical Lead (medical) 6/22 (27.3%)<br>Different members of the team 1/22 (4.5%)<br>Other (Network / Gynaecological Oncology Cancer Alliance Group) 2/22 (9.1%)                                                                          |
| Who provides survivorship support for patients who have undergone treatment for endometrial cancer at your cancer centre/unit? | CNS only 6/22 (27.3%)<br>Macmillan Support worker only 1/22 (4.5%)<br>CNS & Macmillan Support worker 6/22 (27.3%)<br>CNS & Gynaecologist (unit/centre) 2/22 (9.1%)<br>CNS, Gynaecologist (unit & centre), Oncologist (medical/clinical) 1/22 (4.5%)<br>CNS, Macmillan Support worker, Gynaecologist (unit & centre), Oncologist (medical/clinical) 4/22 (18.2%) |

|                                                                                                                                            |                                                                                                                    |
|--------------------------------------------------------------------------------------------------------------------------------------------|--------------------------------------------------------------------------------------------------------------------|
| Does your cancer centre/unit offer a structured survivorship course for patients following completion of treatment for endometrial cancer? | Yes (cancer centre) 7/22 (31.8%)                                                                                   |
|                                                                                                                                            | Yes (cancer unit) 3/22 (13.6%)                                                                                     |
|                                                                                                                                            | No (cancer centre) 4/22 (18.2%)                                                                                    |
|                                                                                                                                            | No (cancer unit) 6/22 (27.3%)                                                                                      |
|                                                                                                                                            | Other (local cancer support centre / Gynaecology wellbeing days) 2/22 (9.1%)                                       |
| If yes, who runs the survivorship course                                                                                                   | CNS only 3/10 (30%)                                                                                                |
|                                                                                                                                            | CNS and Macmillan Support worker 3/10 (30%)                                                                        |
|                                                                                                                                            | Macmillan Support worker only 2/10 (20%)                                                                           |
|                                                                                                                                            | CNS & Other (surgeon) 1/10 (1%)                                                                                    |
|                                                                                                                                            | Cancer Charity 1/10 (1%)                                                                                           |
| Does your cancer centre/unit offer reduced face-to-face clinician follow up for patients diagnosed with endometrial cancer?                | Yes – early stage endometrial cancer 2/22 (9.1%)                                                                   |
|                                                                                                                                            | Yes – early stage, low grade endometrial cancer 9/22 (40.9%)                                                       |
|                                                                                                                                            | Yes- stage/grade dependent on patients' needs and wishes 1/22 (4.5%)                                               |
|                                                                                                                                            | Yes- all stages/grades of endometrial cancer 4/22 (18.2%)                                                          |
|                                                                                                                                            | Yes (early stage, low grade endometrial cancer & stage/grade dependent on patients' needs and wishes) 3/22 (13.6%) |
|                                                                                                                                            | No 2/22 (9.1%)                                                                                                     |
|                                                                                                                                            | Other 1/22 (4.5%) PIFU                                                                                             |
| What type of follow-up model does your centre/unit use?                                                                                    | Nurse- led clinical follow-up only 2/22 (9.1%)                                                                     |
|                                                                                                                                            | Patient initiated follow-up 5/22 (22.7%)                                                                           |
|                                                                                                                                            | Nurse led telephone follow-up 3/22 (13.6%)                                                                         |
|                                                                                                                                            | Nurse led telephone & clinical follow-up 3/22 (13.6%)                                                              |
|                                                                                                                                            | Doctor led telephone follow-up 2/22 (9.1%)                                                                         |
|                                                                                                                                            | Nurse led telephone follow-up & early discharge to primary care 1/22 (4.5%)                                        |
|                                                                                                                                            | Nurse-led clinical follow-up and Patient initiated follow-up 1/22 (4.5%)                                           |
|                                                                                                                                            | Nurse-led clinical/telephone follow-up and Patient initiated follow-up 2/22 (9.1%)                                 |
| If early discharge to primary care, how soon after completion of treatment are patients discharged?                                        | Not Applicable 1/22 (4.5%)                                                                                         |
|                                                                                                                                            | 6 weeks (only once response to Early discharge to primary care)                                                    |
| How long has this scheme been running at your centre/unit? Have any other schemes been used previously?                                    | 15 responses collected                                                                                             |
|                                                                                                                                            | Less than 6 months 1/15 (6.7%)                                                                                     |
|                                                                                                                                            | Between 6-12 months 2/15 (13.3%)                                                                                   |
|                                                                                                                                            | >=2 years 5/15 (33.3%)                                                                                             |
|                                                                                                                                            | >=5 years 6/15 (40%)                                                                                               |
|                                                                                                                                            | Unknown 1/15 (6.7%)                                                                                                |
| Do you keep a database of all patients added to an alternative follow-up scheme?                                                           | Yes – paper records and electronic database – generic 6/22 (27.2%)                                                 |
|                                                                                                                                            | Yes – electronic database – generic 3/22 (13.6%)                                                                   |
|                                                                                                                                            | Yes – electronic database – specific for follow-up 7/22 (31.8%)                                                    |

|                                                                                                                                                                                                               |                                                                                                                                                                                                                                                                                                                                                                                                           |
|---------------------------------------------------------------------------------------------------------------------------------------------------------------------------------------------------------------|-----------------------------------------------------------------------------------------------------------------------------------------------------------------------------------------------------------------------------------------------------------------------------------------------------------------------------------------------------------------------------------------------------------|
|                                                                                                                                                                                                               | Yes – electronic database – generic & specific for follow-up 1/22 (4.5%)<br>No- 2/22 (9.1%)<br>Not applicable & unanswered 2/22 (9.1%)<br>Other (own record) 1/22 (4.5%)                                                                                                                                                                                                                                  |
| Do you keep documentation of contacts from patients on alternative follow-up schemes?                                                                                                                         | Yes – paper records and electronic database – generic 2/22 (9.1%)<br>Yes paper records & Other (appointment records) 1/22 (4.5%)<br>Yes – electronic database – generic 6/22 (27.2%)<br>Yes – electronic database – specific for follow-up 4/22 (18.2%)<br>Yes – electronic database – generic & specific for follow-up 1/22 (4.5%)<br>No- 1/22 (4.5%)<br>Not applicable 2/22 (9.1%)<br>Other 1/22 (4.5%) |
| Do the Clinical Nurse Specialists have administrative support to help with running the scheme?                                                                                                                | Yes 6/22 (27.2%)<br>No 12/22 (54.5%)<br>Not applicable or Unanswered 4/22 (18.2%)                                                                                                                                                                                                                                                                                                                         |
| Are there any aspects of the alternative follow-up scheme at your centre/unit that you would like to change?                                                                                                  | Free text comments                                                                                                                                                                                                                                                                                                                                                                                        |
| Are there any aspects that you have found patients particularly struggle with if transferred to an alternative follow-up scheme?                                                                              | Free text comments                                                                                                                                                                                                                                                                                                                                                                                        |
| In your opinion is there an alternative follow-up model that patients prefer or dislike more than others? Please give details                                                                                 | Free text comments                                                                                                                                                                                                                                                                                                                                                                                        |
| Do you have peer support from another clinical nurse specialist in managing the scheme? If not where do you go for support?                                                                                   | Free text comments                                                                                                                                                                                                                                                                                                                                                                                        |
| Do you think the COVID-19 situation has changed your attitude to the follow-up of endometrial cancer? If so how?                                                                                              | Free text comments                                                                                                                                                                                                                                                                                                                                                                                        |
| Has the COVID-19 situation changed the way that you and your centre/unit for asymptomatic endometrial cancer patients (no suspicion of recurrence) that typically attend for hospital follow-up appointments? | Changed follow-up appointment to telephone follow-up (CNS) 5/22 (22.7%)<br>Changed follow-up appointment to telephone follow-up (Doctors) 6/22 (27.2%)<br>Changed follow-up appointment to telephone follow-up (CNS & Doctors) 4/22 (18.2%)<br>Changed follow-up appointment to Patient initiated follow-up 2/22 (9.1%)<br>Stopped face-to face follow-up appointments 1/22 (4.5%)                        |

|                                                                                                                                       |                                                                                                                                                                                                                                                                                                   |
|---------------------------------------------------------------------------------------------------------------------------------------|---------------------------------------------------------------------------------------------------------------------------------------------------------------------------------------------------------------------------------------------------------------------------------------------------|
|                                                                                                                                       | Stopped face-to face follow-up appointments & Changed follow-up appointment to telephone follow-up & Patient initiated follow up 1/22 (4.5%)<br>Stopped face-to face follow-up appointments & Changed follow-up appointment to telephone follow-up (CNS/Doctors) 1/22 (4.5%)<br>Other 1/22 (4.5%) |
| Have you noticed a change in the contact from patients on follow-up for endometrial cancer during the COVID-19 situation?             | Yes, More patient contact/greater patient anxiety due to covid<br>No, patients trying to avoid attending hospital<br>No                                                                                                                                                                           |
| Have you undergone any specific training to manage patients on the alternative follow-up scheme in place at your cancer centre/unit?  | (free text – comments very varied answers not enough to mark as a percentage)                                                                                                                                                                                                                     |
| Are there any aspects of the follow-up scheme and endometrial cancer survivorship that you do not feel you are trained to manage?     | Free text comments                                                                                                                                                                                                                                                                                |
| Are there any aspects of patient follow-up and survivorship in endometrial cancer that you would like to have additional training on? | Free text comments                                                                                                                                                                                                                                                                                |
| Are there any aspects of patient follow-up and survivorship in endometrial cancer that you would like to have additional training on? | Free text comments                                                                                                                                                                                                                                                                                |
| How would you prefer any additional training to be delivered?                                                                         |                                                                                                                                                                                                                                                                                                   |
| Would you be interested in undertaking a post-graduate qualification in cancer survivorship?                                          | Yes 5/22<br>Yes (distance learning only) 6/22<br>Maybe 8/22<br>Other 3/22                                                                                                                                                                                                                         |

Table S2. Results of Audience Survey (n=83)\*.

| Question                                                                                                                                       | Response (%)                                                                                                                                                                                                                                             |
|------------------------------------------------------------------------------------------------------------------------------------------------|----------------------------------------------------------------------------------------------------------------------------------------------------------------------------------------------------------------------------------------------------------|
| Which patients should be offered reduced face-to-face clinician follow up following primary treatment for endometrial cancer?                  | All stages & grades (10%)<br>Stage 1, Low Risk only (56%)<br>Stage I, all risk (6%)<br>Selected patients of any stage or risk (25%)<br>None (2%)<br>Don't know (2%)                                                                                      |
| Which is the best alternative follow-up scheme instead of face-to-face clinician follow-up following primary treatment for endometrial cancer? | Patient Initiated Follow-up (52%)<br>Nurse- led telephone Follow-up (29%)<br>Doctor-led telephone Follow-up (2%)<br>Nurse-led clinical Follow-up (12%)<br>Follow-up in primary care (2%)<br>Reduced schedule clinician Follow-up (3%)<br>Don't Know (0%) |

|                                                                                                                                                                          |                                                                                                                                                                                               |
|--------------------------------------------------------------------------------------------------------------------------------------------------------------------------|-----------------------------------------------------------------------------------------------------------------------------------------------------------------------------------------------|
| How soon after completing treatment for low-risk endometrial cancer should patients be transferred to an alternative follow-up scheme                                    | 3months (50%)<br>Immediately OR within 6 months (18% each)<br>1 year (13%)<br>2 years (2%)<br>3 years/ Don't Know / Never (0%)                                                                |
| How soon after completing treatment for high-risk endometrial cancer should patients be transferred to an alternative follow-up scheme?                                  | Two years (54%)<br>Three years (16%)<br>Never (11%)<br>Immediately (3%)<br>1 year (10%)<br>3 months (5%)<br>6 months (0%)<br>Don't know (0%)                                                  |
| Is attendance at a structured survivorship programme beneficial to patients after completing treatment for endometrial cancer?                                           | Yes (89%)<br>No (5%)<br>Don't know (7%)                                                                                                                                                       |
| Should regular imaging (CT/MRI) be included in an alternative FU scheme for low risk endometrial cancer?                                                                 | Yes (19%)<br>No (73%)<br>Don't know (8%)                                                                                                                                                      |
| Should regular imaging (CT/MRI) be included in an alternative FU scheme for high-risk endometrial cancer?                                                                | Yes (71%)<br>No (21%)<br>Don't know (8%)                                                                                                                                                      |
| Should an alternative FU scheme for low risk endometrial cancer be standard of care or optional?                                                                         | Yes (66%)<br>Optional (34%)<br>Not offered (0%)                                                                                                                                               |
| Should alternative FU scheme for high risk endometrial cancer be standard of care?                                                                                       | Optional (59%)<br>Standard of care (40%)<br>Not offered (2%)                                                                                                                                  |
| Would you be more confident in transferring patients to an alternative FU scheme if they were able to have monitoring with a tumour marker that could detect recurrence? | Yes (90%)<br>No (5%)<br>Don't know (5%)                                                                                                                                                       |
| What detection level would be needed for a tumour marker?                                                                                                                | 100 % (2%)<br>95% (45%)<br>90% (29%)<br>85% (13%)<br>75% (5%)<br>50% (6%)                                                                                                                     |
| Would the development of a standardised, national alternative follow up scheme be of interest to your cancer centre/unit?                                                | Yes (97%)<br>No (2%)<br>Don't know (2%)                                                                                                                                                       |
| Would you be interested in participating in a clinical trial of a remote monitoring scheme using a tumour marker versus clinician-led follow-up?                         | Yes – All stages and grades (44%)<br>Yes (Stage 1 low risk only) (23%)<br>Yes (Stage 1 all-risk only) (5%)<br>Yes selected patients at any stage or risk (11%)<br>No (4%)<br>Don't know (14%) |

\* not all participants answered every question

**Figure S1.** Interview Schedule.

- 1) What is your current role? Prompt: oncologist; gynaecological oncologist; gynaecologist (unit lead); CNS; other
- 2) Where do you work? Prompt: Cancer centre; cancer unit; both; other
- 3) Are you actively involved in the follow-up care of EC patients? Prompt: can you describe how? Joint clinic?
- 4) Is there a stratified risk follow-up for EC at your hospital at present? If yes, what model is it? Prompt: Telephone follow-up; patient-initiated follow-up; early discharge to GP; other. \* if No go to question 8
- 5) What are the criteria for patients to be placed on this follow-up pathway? Prompt: Low risk only; early stage only; all stages/risk; selected patients; other
- 6) What do you see as the benefits of such a scheme? Do you think this view is shared by the colleagues in your team?
- 7) Have you found any problems with such a scheme? Do you think this view is shared by the colleagues in your team?
- 8) What are your thoughts on the different risk-stratified follow-up models eg telephone or patient-initiated follow-up? In your view do they have any particular benefits or problems?
- 9) Which is your preferred model? What are the reasons for your choice?
- 10) When in your view is the optimum time to discharge patients back to primary care after completion of treatment for endometrial cancer? Prompt: After treatment; 3 months; 1 years; 5 years; never
- 11) How do you see the future of endometrial cancer follow? Prompt: will risk stratified follow-schemes be expanded?
- 12) Do you see a potential role for a national standardised risk stratified endometrial cancer follow-up scheme with a standard protocol and management pathways? What in your view are the advantages or disadvantages of such a scheme?
- 13) Do you feel that a survivorship programme designed specifically for endometrial cancer would be something that would be of interest to patients? Is it something that you would be happy to recommend to patients?
- 14) If a tumour marker with a high sensitivity to detect endometrial cancer recurrence was available, could you see a role for a remote monitoring scheme, similar to the use of PSA in prostate cancer monitoring? Would it increase your confidence in transferring patients from routine clinical follow-up? What in your view would be the advantages and disadvantages of remote monitoring?
- 15) Should a tumour marker be available, how do you see the structure of a remote monitoring scheme? Would it benefit from having a way of patients contacting their clinical nurse specialist?

---

16) Do you think there will be any barriers to acceptance of a remote monitoring scheme by patients? By clinicians?

17) Are there any other points you would like to make?
